# Supplementary material
Source: PubMed Central journal article supplement (PMC5474129)
Supplement: NIHMS844300-supplement.pdf [file NIHMS844300-supplement.pdf]

Supplemental Table 2: Standardized change from baseline for outcomes of social cognitive function

| Outcome Variable <sup>1</sup>                 | Time Point (wks) | Oxytocin |              |                             | Placebo |              |                             | P-Value <sup>3</sup> Trt Diff |
|-----------------------------------------------|------------------|----------|--------------|-----------------------------|---------|--------------|-----------------------------|-------------------------------|
|                                               |                  | N        | LS Mean (SE) | P-Value <sup>2</sup> Diff>0 | N       | LS Mean (SE) | P-Value <sup>2</sup> Diff>0 |                               |
| Eyes Test Total                               | 6                | 27       | -0.09 (0.11) | 0.422                       | 27      | -0.20 (0.11) | 0.070                       | 0.472                         |
|                                               | 12               | 26       | -0.15 (0.13) | 0.227                       | 27      | 0.03 (0.12)  | 0.798                       | 0.302                         |
| ER40 Total                                    | 6                | 28       | 0.28 (0.11)  | 0.014                       | 29      | 0.17 (0.11)  | 0.129                       | 0.475                         |
|                                               | 12               | 26       | 0.03 (0.10)  | 0.782                       | 29      | 0.19 (0.10)  | 0.058                       | 0.270                         |
| Brüne-A Total                                 | 6                | 28       | 0.29 (0.11)  | 0.010                       | 28      | 0.38 (0.10)  | 0.001                       | 0.552                         |
|                                               | 12               | 26       | 0.39 (0.12)  | 0.002                       | 29      | 0.52 (0.12)  | 0.000                       | 0.469                         |
| AIHQ Blame Bias                               | 6                | 27       | 0.01 (0.16)  | 0.926                       | 29      | 0.10 (0.15)  | 0.523                       | 0.712                         |
|                                               | 12               | 25       | -0.18 (0.15) | 0.228                       | 29      | -0.15 (0.14) | 0.308                       | 0.860                         |
| Trustworthiness task - untrustworthy subscale | 6                | 27       | 0.02 (0.14)  | 0.894                       | 28      | 0.10 (0.14)  | 0.479                       | 0.694                         |
|                                               | 12               | 25       | 0.08 (0.14)  | 0.591                       | 29      | 0.02 (0.13)  | 0.875                       | 0.779                         |
| Trustworthiness task - trustworthy subscale   | 6                | 27       | 0.16 (0.12)  | 0.194                       | 28      | -0.07 (0.11) | 0.546                       | 0.183                         |
|                                               | 12               | 25       | -0.09 (0.13) | 0.479                       | 29      | -0.04 (0.12) | 0.761                       | 0.760                         |

Abbreviations: LS, least squares; ER-40, Emotion Recognition-40 task; AIHQ, Ambiguous Intentions Hostility Questionnaire

<sup>1</sup>Models adjusted for baseline value and age in addition to treatment group.

<sup>2</sup>Test for within-group change

<sup>3</sup>Test for between-group change

Supplemental Table 3: Standardized change from baseline for outcomes of social functioning

| Variable <sup>1</sup> | Time Point (wks) | Oxytocin |              |                                | Placebo |              |                                | P-Value <sup>3</sup><br>Trt Diff |
|-----------------------|------------------|----------|--------------|--------------------------------|---------|--------------|--------------------------------|----------------------------------|
|                       |                  | N        | LS Mean (SE) | P-Value <sup>2</sup><br>Diff>0 | N       | LS Mean (SE) | P-Value <sup>2</sup><br>Diff>0 |                                  |
| SLOF-I IR             | 12               | 17       | 0.13 (0.24)  | 0.297                          | 12      | 0.17 (0.29)  | 0.275                          | 0.455                            |
| SLOF-P IR             | 12               | 26       | -0.16 (0.19) | 0.195                          | 27      | -0.52 (0.19) | 0.003                          | 0.096                            |
| SLOF-I SA             | 12               | 17       | 0.17 (0.15)  | 0.116                          | 13      | 0.19 (0.17)  | 0.122                          | 0.463                            |
| SLOF-P SA             | 12               | 26       | 0.32 (0.20)  | 0.050                          | 28      | 0.17 (0.19)  | 0.188                          | 0.287                            |
| SSPA Verbal SS        | 6                | 26       | -0.21 (0.14) | 0.145                          | 28      | 0.38 (0.14)  | 0.008                          | 0.005                            |
|                       | 12               | 23       | 0.07 (0.17)  | 0.692                          | 24      | 0.18 (0.17)  | 0.277                          | 0.631                            |
| SSPA Nonverbal SS     | 6                | 26       | -0.01 (0.14) | 0.967                          | 28      | 0.14 (0.14)  | 0.316                          | 0.472                            |
|                       | 12               | 23       | 0.02 (0.12)  | 0.878                          | 24      | 0.07 (0.12)  | 0.537                          | 0.748                            |
| SSPA Global SS        | 6                | 26       | -0.48 (0.17) | 0.007                          | 28      | 0.01 (0.16)  | 0.950                          | 0.045                            |
|                       | 12               | 23       | -0.25 (0.17) | 0.152                          | 24      | -0.21 (0.17) | 0.233                          | 0.847                            |

Abbreviations: LS, least squares; SLOF-I, Specific Levels of Functioning Scale - Informant; SLOF-P, SLOF-Participant; IR, Interpersonal Relationships; SA, Social Acceptability; SSPA, Social Skills Performance Assessment; SS, Social Skill

<sup>1</sup>Models adjusted for baseline value and age in addition to treatment group.

<sup>2</sup>Test for within-group change

<sup>3</sup>Test for between-group change

Supplemental Table 4: Standardized change from baseline for PANSS following 12 weeks of treatment

| Outcome Variable <sup>1</sup> | Time Point (wks) | Oxytocin |              |                             | Placebo |              |                             | P-Value <sup>3</sup> Trt Diff |
|-------------------------------|------------------|----------|--------------|-----------------------------|---------|--------------|-----------------------------|-------------------------------|
|                               |                  | N        | LS Mean (SE) | P-Value <sup>2</sup> Diff>0 | N       | LS Mean (SE) | P-Value <sup>2</sup> Diff>0 |                               |
| PANSS Total                   | 2                | 32       | -0.34 (0.11) | 0.004                       | 30      | -0.50 (0.12) | 0.000                       | 0.310                         |
|                               | 6                | 28       | -0.27 (0.12) | 0.035                       | 29      | -0.46 (0.12) | 0.000                       | 0.279                         |
|                               | 9                | 27       | -0.35 (0.14) | 0.016                       | 29      | -0.39 (0.14) | 0.006                       | 0.815                         |
|                               | 12               | 26       | -0.29 (0.13) | 0.032                       | 29      | -0.45 (0.13) | 0.001                       | 0.389                         |
| PANSS Positive                | 2                | 32       | -0.25 (0.09) | 0.007                       | 30      | -0.29 (0.09) | 0.003                       | 0.774                         |
|                               | 6                | 28       | -0.12 (0.11) | 0.292                       | 29      | -0.35 (0.11) | 0.003                       | 0.168                         |
|                               | 9                | 27       | -0.29 (0.12) | 0.025                       | 29      | -0.31 (0.12) | 0.014                       | 0.894                         |
|                               | 12               | 26       | -0.23 (0.12) | 0.056                       | 29      | -0.31 (0.11) | 0.008                       | 0.614                         |
| PANSS Negative                | 2                | 32       | -0.26 (0.11) | 0.024                       | 30      | -0.14 (0.12) | 0.232                       | 0.467                         |
|                               | 6                | 28       | -0.28 (0.13) | 0.044                       | 29      | -0.08 (0.13) | 0.558                       | 0.303                         |
|                               | 9                | 27       | -0.20 (0.12) | 0.099                       | 29      | -0.03 (0.12) | 0.816                       | 0.309                         |
|                               | 12               | 26       | -0.25 (0.13) | 0.051                       | 29      | -0.14 (0.12) | 0.261                       | 0.521                         |
| PANSS General                 | 2                | 32       | -0.27 (0.13) | 0.042                       | 30      | -0.63 (0.14) | 0.000                       | 0.071                         |
|                               | 6                | 28       | -0.22 (0.12) | 0.077                       | 29      | -0.54 (0.12) | 0.000                       | 0.076                         |
|                               | 9                | 27       | -0.30 (0.17) | 0.087                       | 29      | -0.48 (0.17) | 0.006                       | 0.460                         |
|                               | 12               | 26       | -0.22 (0.14) | 0.127                       | 29      | -0.51 (0.14) | 0.001                       | 0.164                         |

Abbreviations: LS, least squares; PANSS, Positive and Negative Syndrome Scale

<sup>1</sup>Models adjusted for baseline value and age in addition to treatment group.

<sup>2</sup>Test for within-group change

<sup>3</sup>Test for between-group change
